# Supplementary material for: Toxicity and Anti-Inflammatory Activity of Phenolic-Rich Extract from Nopalea cochenillifera (Cactaceae): A Preclinical Study on the Prevention of Inflammatory Bowel Diseases
Source: Plants (Basel). 2023 Jan 29;12(3):594. doi: 10.3390/plants12030594 (PMC9921826; doi:10.3390/plants12030594)
Supplement: Supplementary file 1 [file plants-12-00594-s001.zip › plants-2109924-supplementary.pdf]

# Supplementary Material

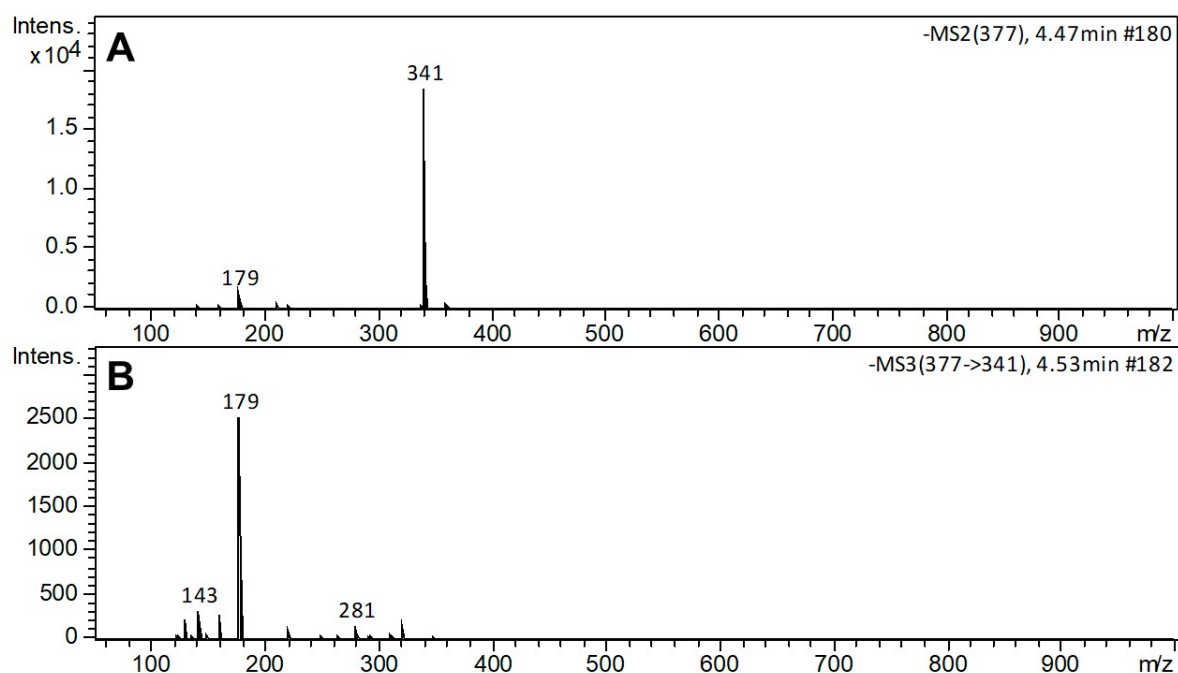

**Figure S1.** CID-MS<sup>n</sup> mass spectra in negative ion mode for compound 1: (A) CID-MS<sup>2</sup> spectrum of the precursor ion at  $m/z$  377; (B) CID-MS<sup>3</sup> mass spectrum of the product ion at  $m/z$  341.

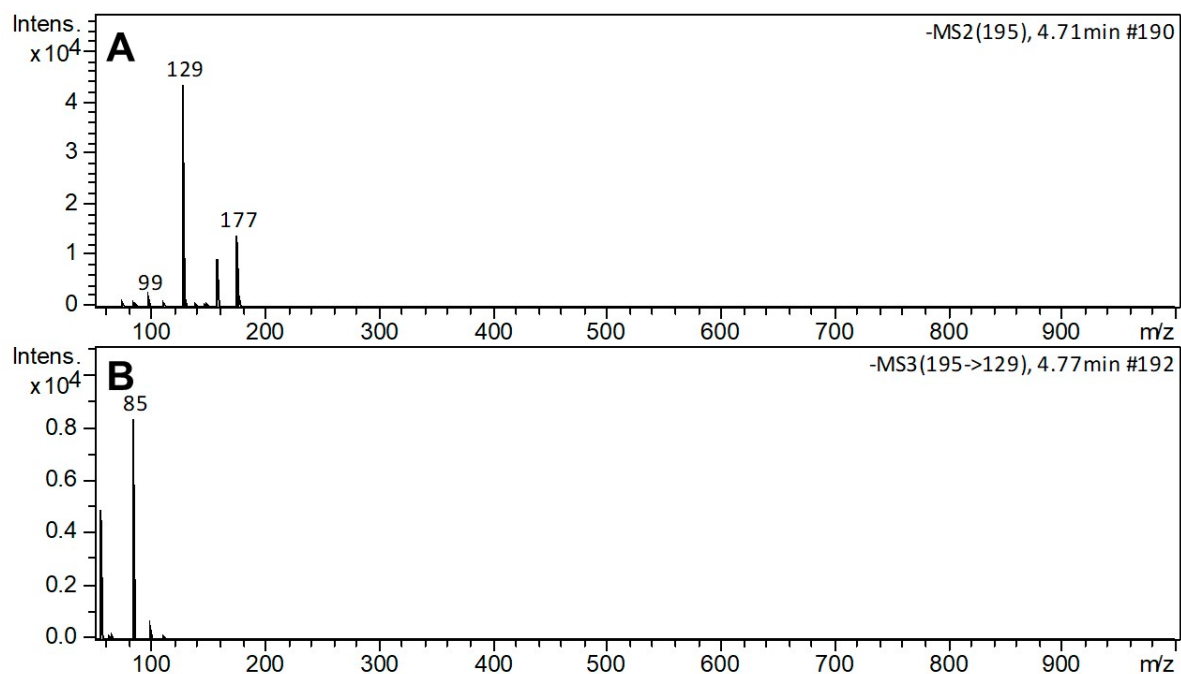

**Figure S2.** CID-MS<sup>n</sup> mass spectra in negative ion mode for compound 2: (A) CID-MS<sup>2</sup> spectrum of the precursor ion at  $m/z$  195; (B) CID-MS<sup>3</sup> mass spectrum of the product ion at  $m/z$  129.

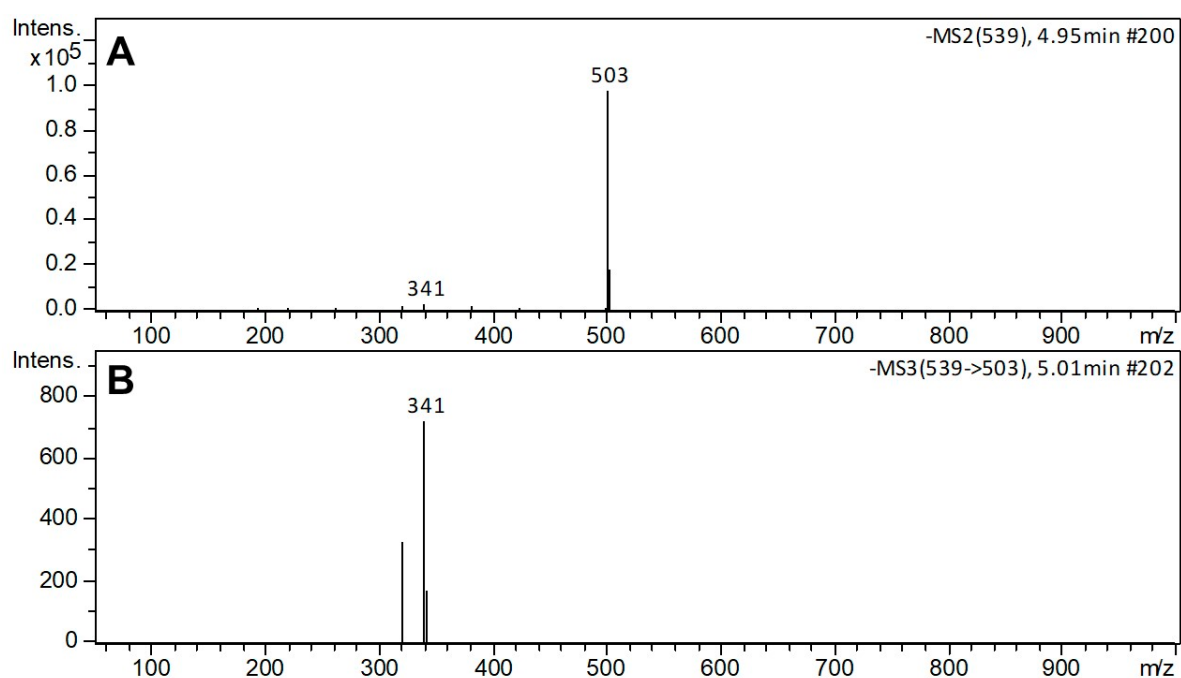

**Figure S3.** CID-MS<sup>n</sup> mass spectra in negative ion mode for compound 3: (A) CID-MS<sup>2</sup> spectrum of the precursor ion at  $m/z$  539; (B) CID-MS<sup>3</sup> mass spectrum of the product ion at  $m/z$  503.

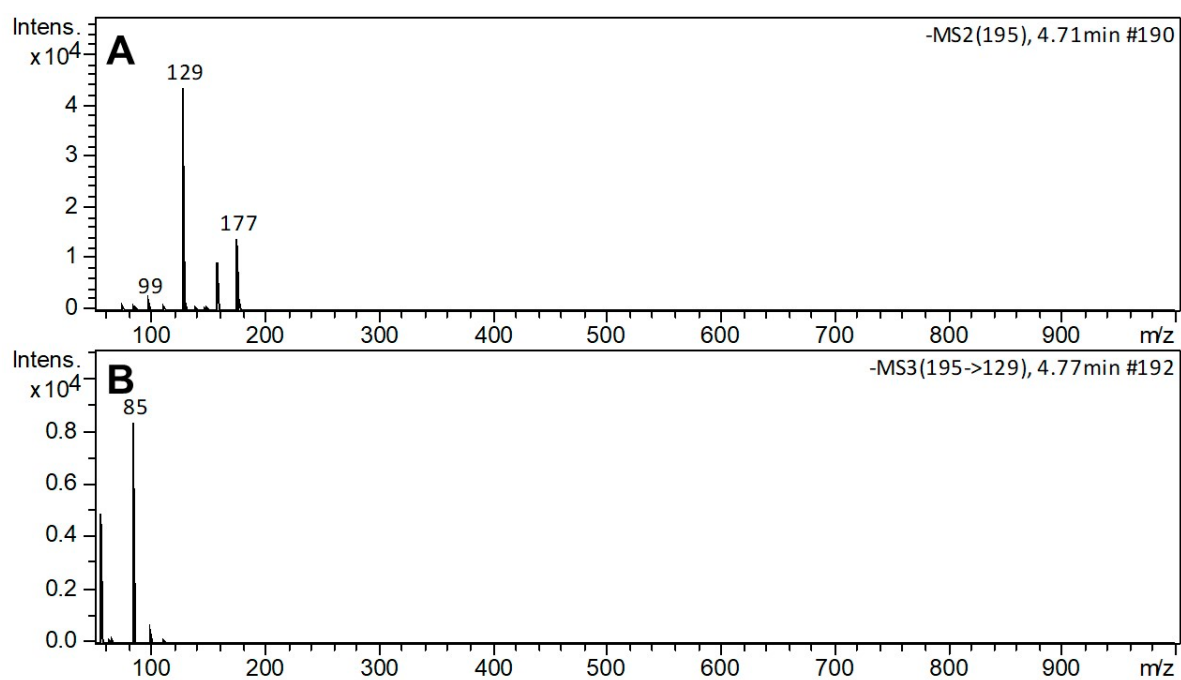

**Figure S4.** CID-MS<sup>n</sup> mass spectra in negative ion mode for compound 1: (A) CID-MS<sup>2</sup> spectrum of the precursor ion at  $m/z$  377; (B) CID-MS<sup>3</sup> mass spectrum of the product ion at  $m/z$  341.

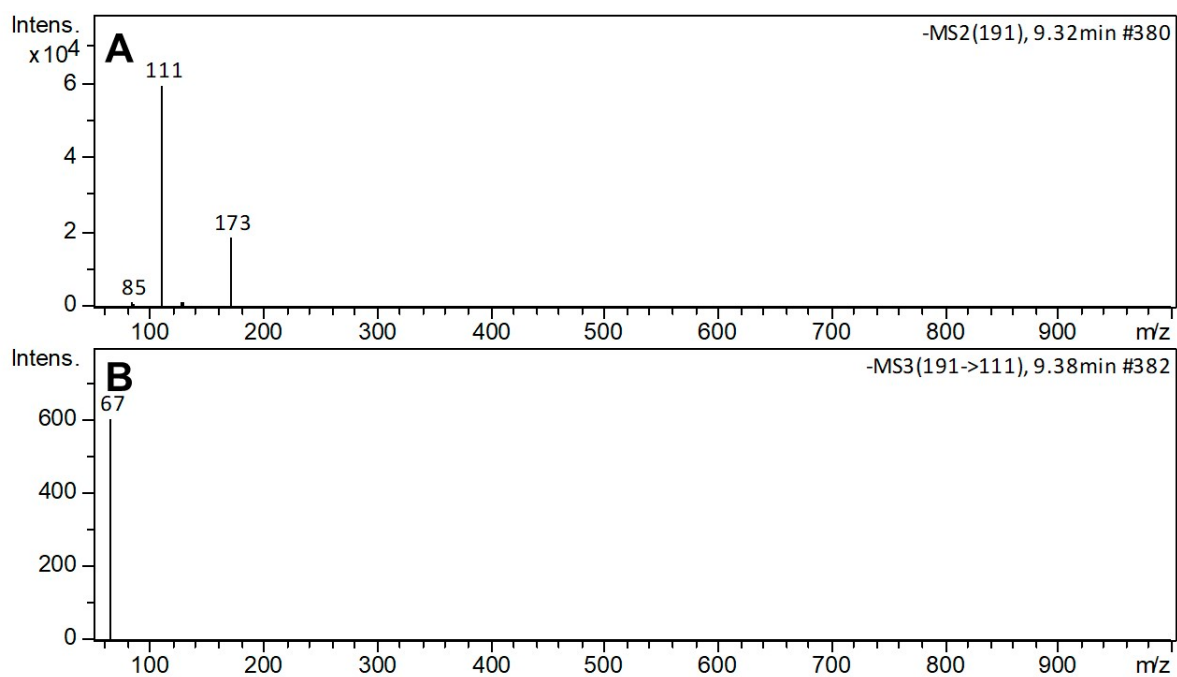

**Figure S5.** CID-MS<sup>n</sup> mass spectra in negative ion mode for compound 5: (A) CID-MS<sup>2</sup> spectrum of the precursor ion at  $m/z$  191; (B) CID-MS<sup>3</sup> mass spectrum of the product ion at  $m/z$  111.

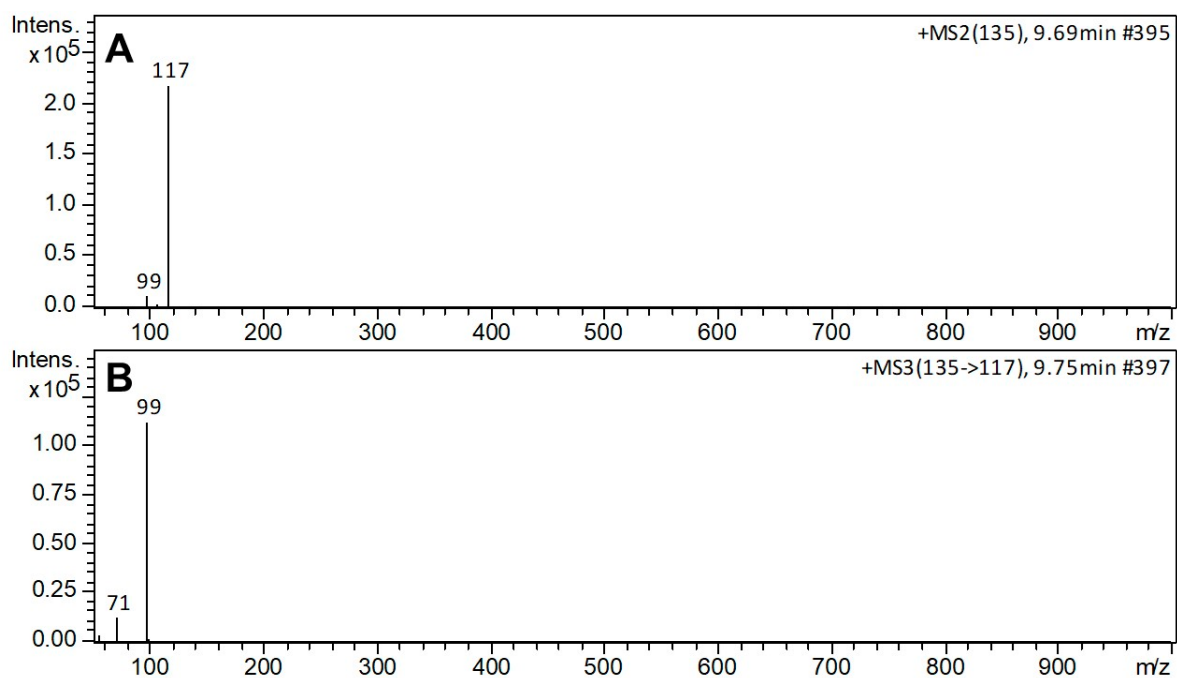

**Figure S6.** CID-MS<sup>n</sup> mass spectra in negative ion mode for compound 6: (A) CID-MS<sup>2</sup> spectrum of the precursor ion at  $m/z$  135; (B) CID-MS<sup>3</sup> mass spectrum of the product ion at  $m/z$  117

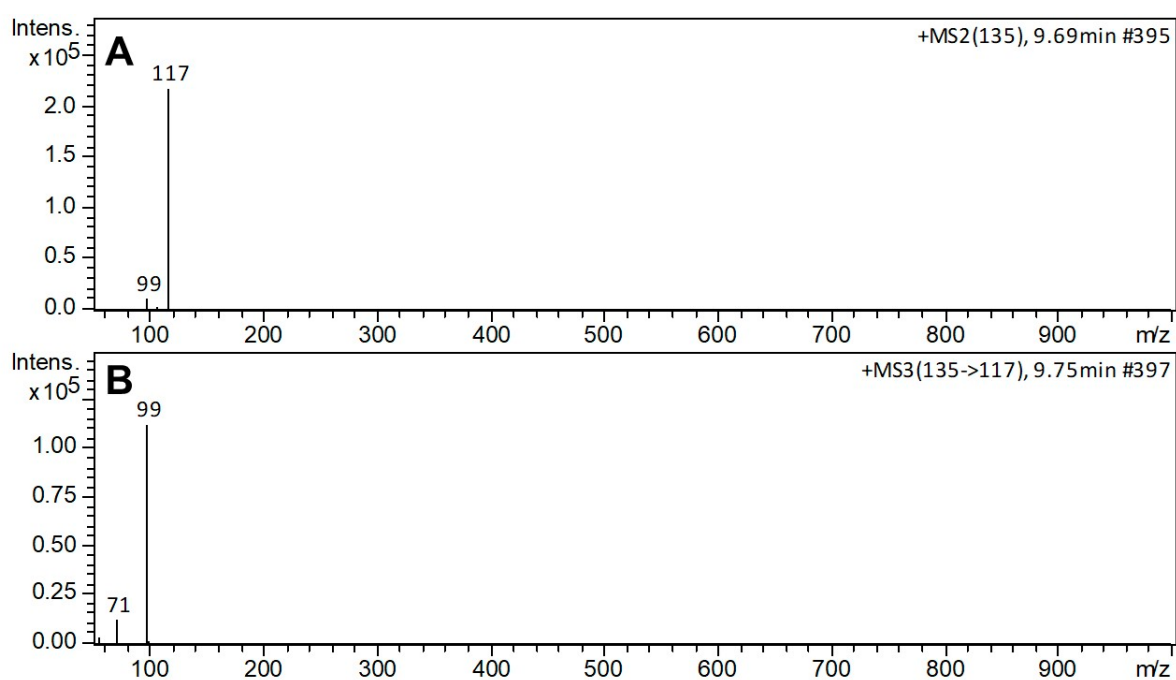

**Figure S7.** -MS<sup>n</sup> mass spectra in positive ion mode for compound 7: (A) CID-MS<sup>2</sup> spectrum of the precursor ion at  $m/z$  284; (B) CID-MS<sup>3</sup> mass spectrum of the product ion at  $m/z$  152.

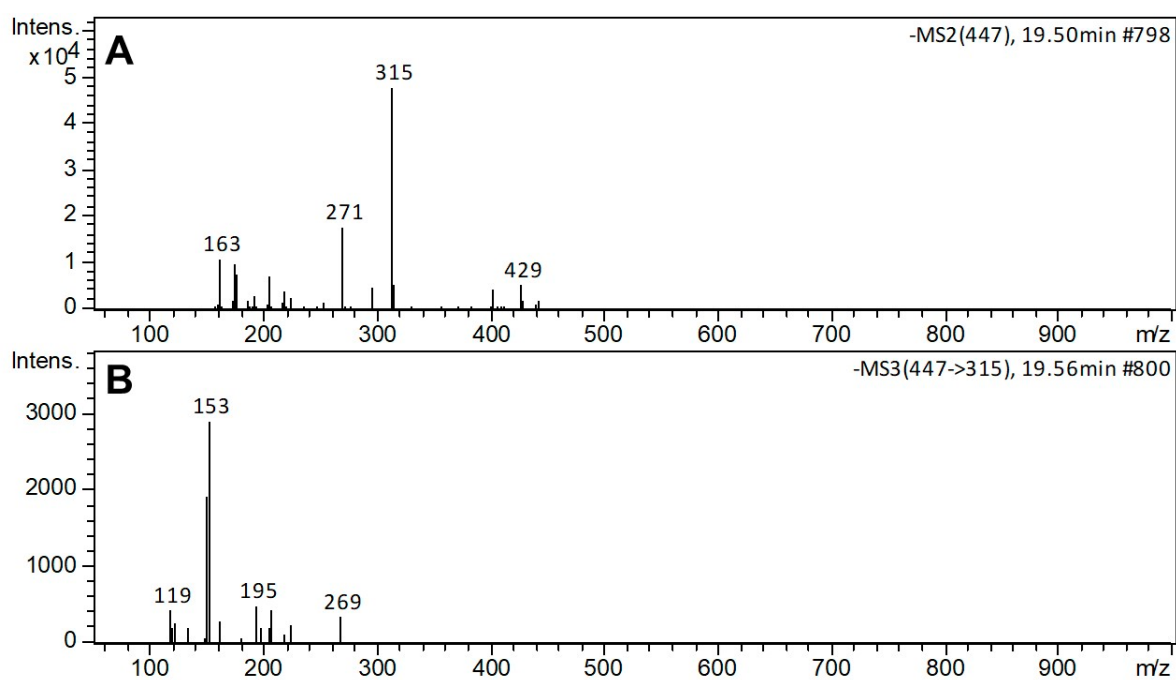

**Figure S8.** CID-MS<sup>n</sup> mass spectra in negative ion mode for compound 8: (A) CID-MS<sup>2</sup> spectrum of the precursor ion at  $m/z$  447; (B) CID-MS<sup>3</sup> mass spectrum of the product ion at  $m/z$  315.

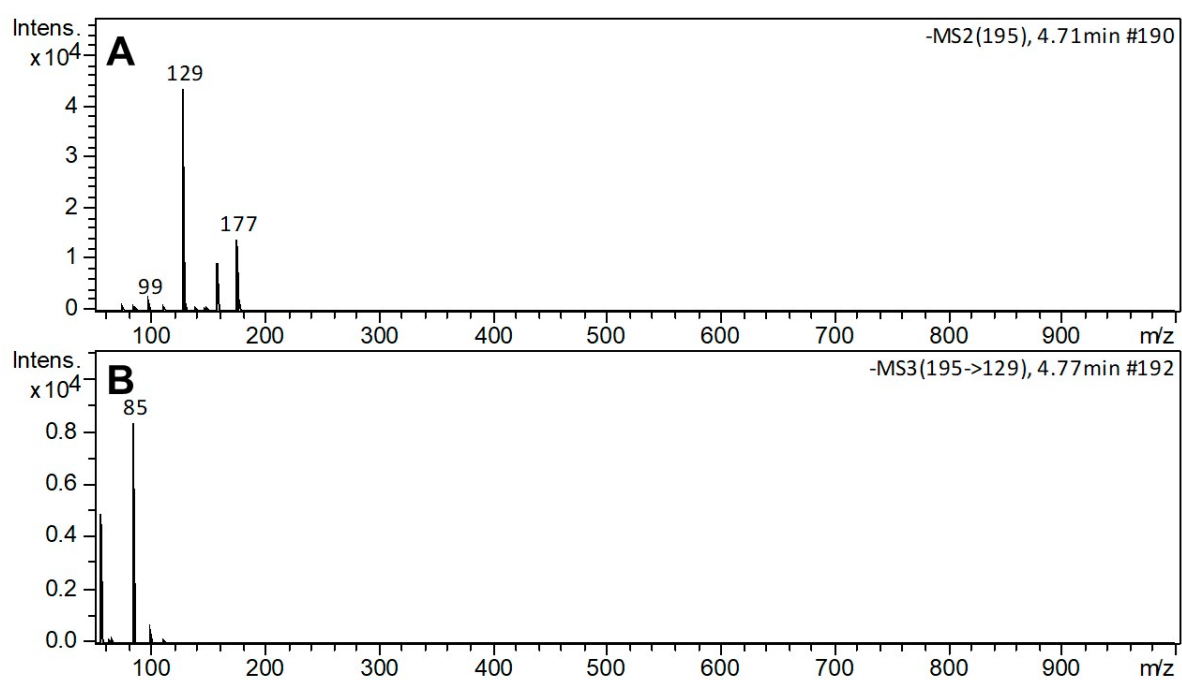

**Figure S9.** CID-MS<sup>n</sup> mass spectra in negative ion mode for compound 9: (A) CID-MS<sup>2</sup> spectrum of the precursor ion at  $m/z$  447; (B) CID-MS<sup>3</sup> mass spectrum of the product ion at  $m/z$  315.

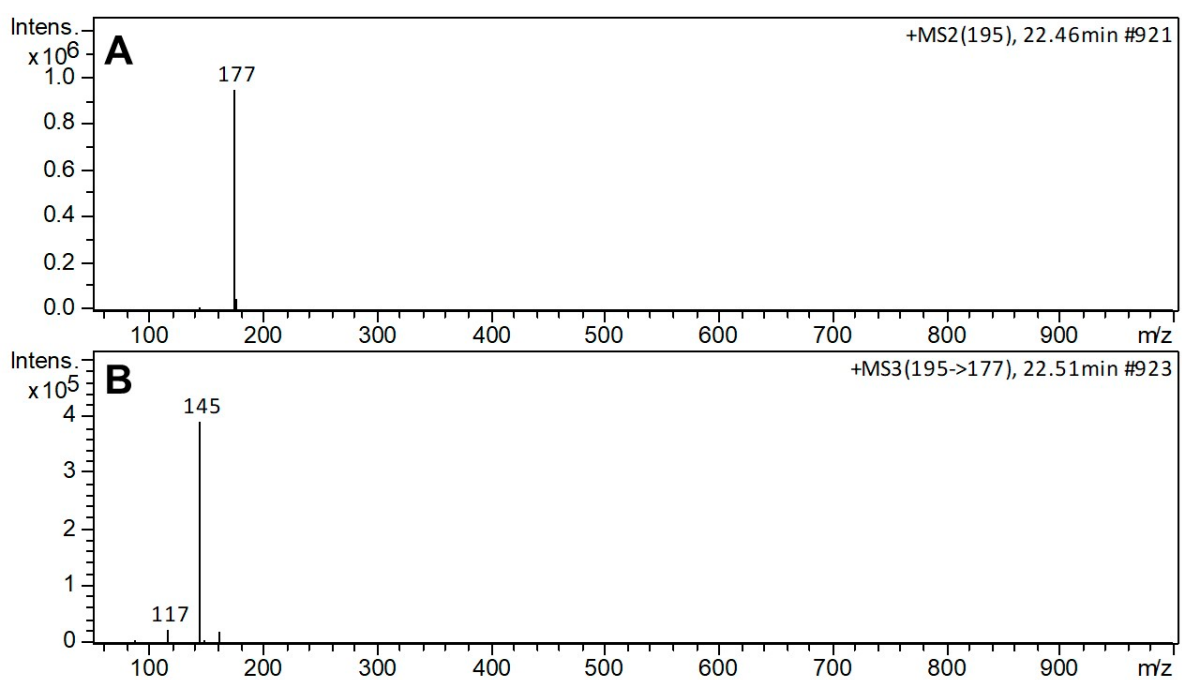

**Figure S10.** CID-MS<sup>n</sup> mass spectra in positive ion mode for compound 10: (A) CID-MS<sup>2</sup> spectrum of the precursor ion at  $m/z$  195; (B) CID-MS<sup>3</sup> mass spectrum of the product ion at  $m/z$  177.

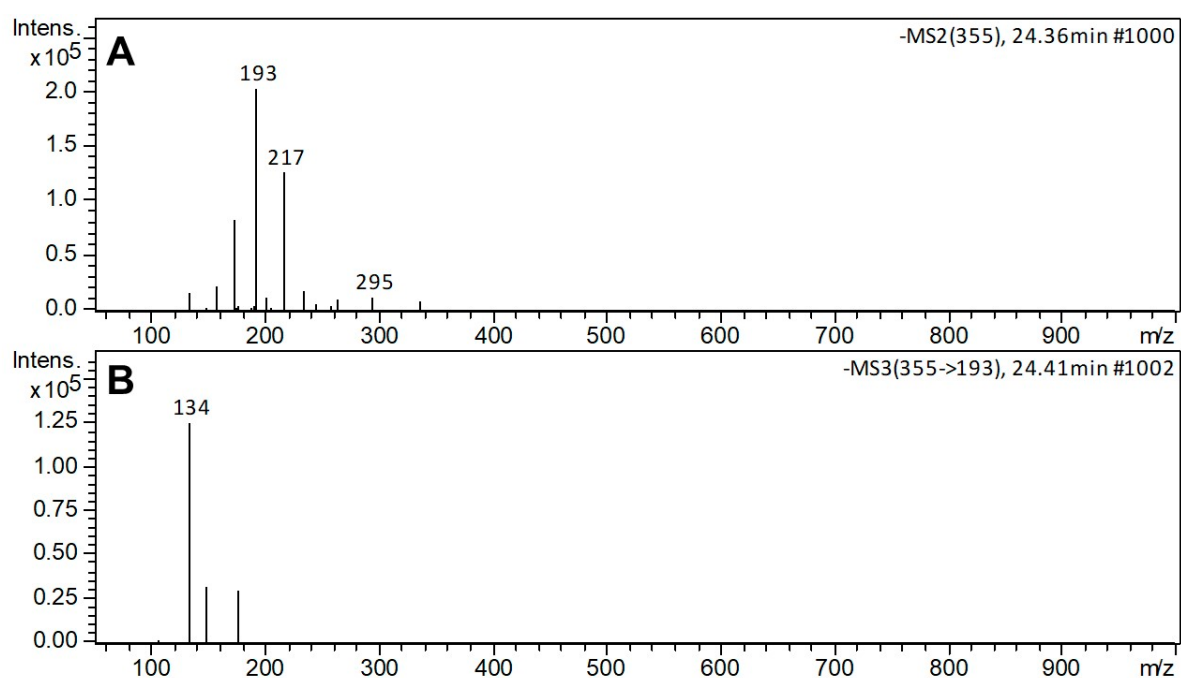

**Figure S11.** CID-MS<sup>n</sup> mass spectra in negative ion mode for compound 11: (A) CID-MS<sup>2</sup> spectrum of the precursor ion at  $m/z$  355; (B) CID-MS<sup>3</sup> mass spectrum of the product ion at  $m/z$  193.

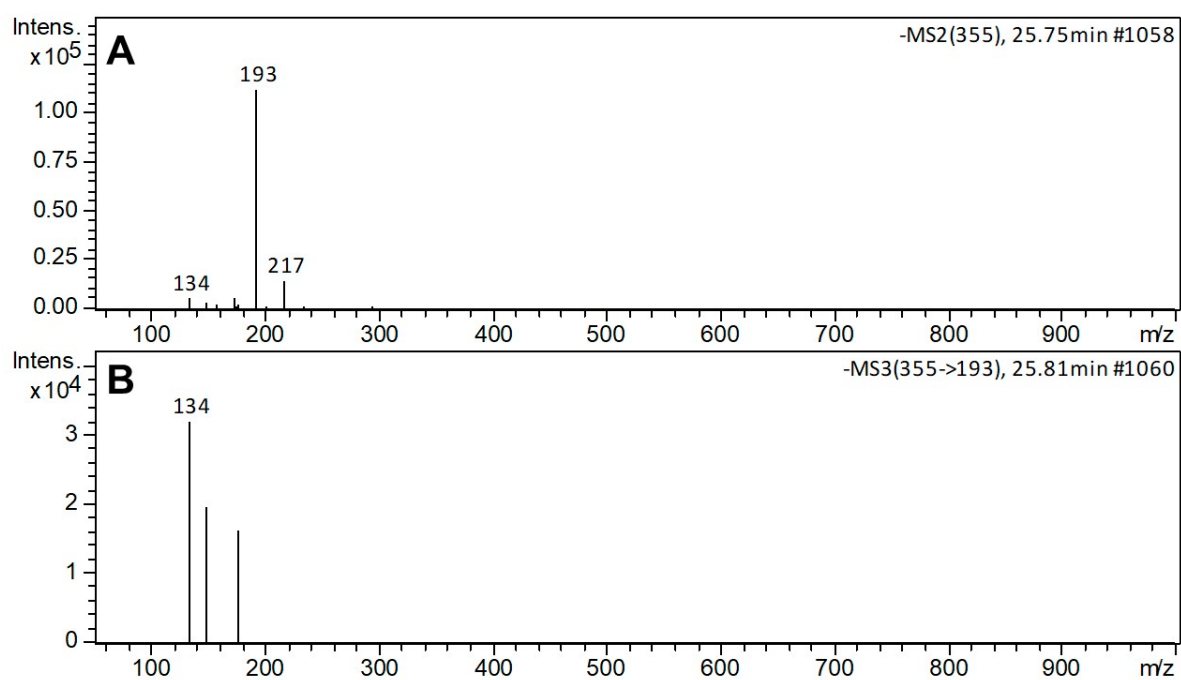

**Figure S12.** CID-MS<sup>n</sup> mass spectra in negative ion mode for compound 12: (A) CID-MS<sup>2</sup> spectrum of the precursor ion at  $m/z$  355; (B) CID-MS<sup>3</sup> mass spectrum of the product ion at  $m/z$  193.

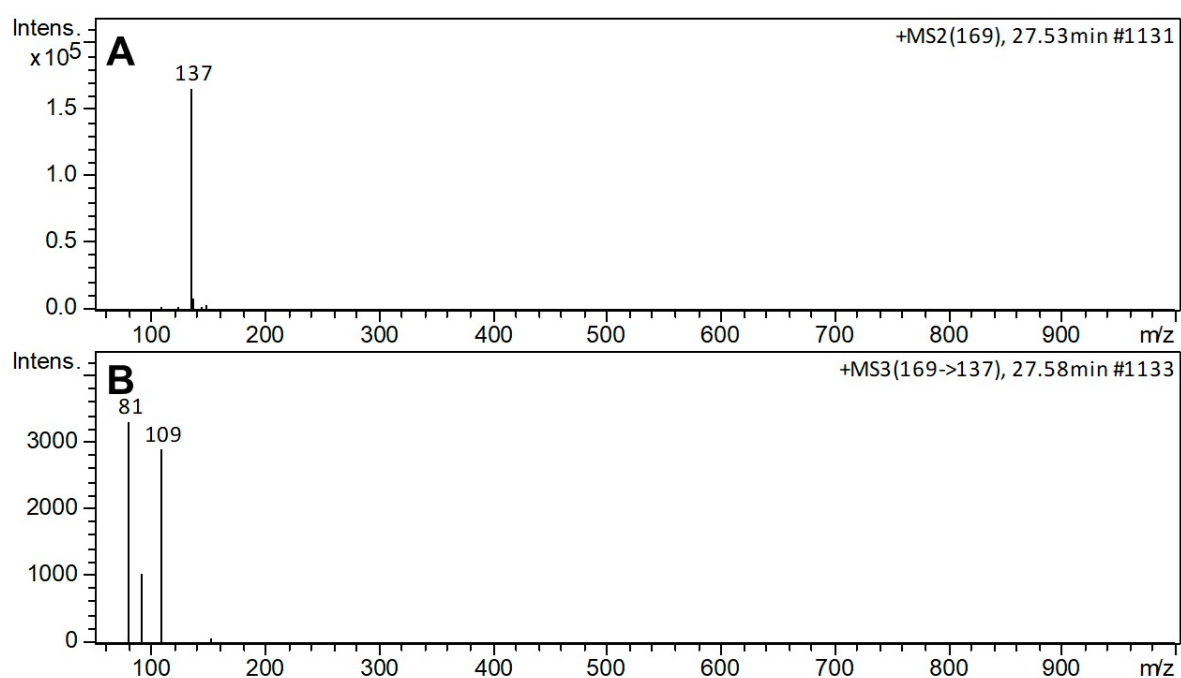

**Figure S13.** CID-MS<sup>n</sup> mass spectra in positive ion mode for compound 13: (A) CID-MS<sup>2</sup> spectrum of the precursor ion at  $m/z$  169; (B) CID-MS<sup>3</sup> mass spectrum of the product ion at  $m/z$  137.

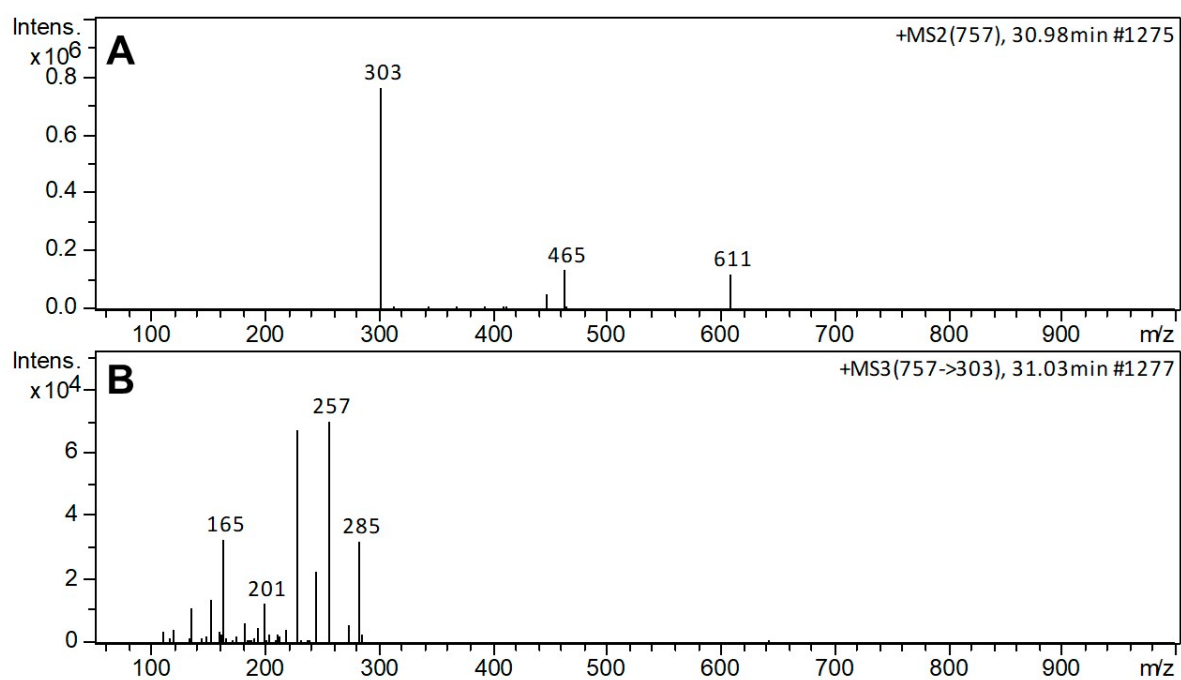

**Figure S14.** CID-MS<sup>n</sup> mass spectra in positive ion mode for compound 14: (A) CID-MS<sup>2</sup> spectrum of the precursor ion at  $m/z$  757; (B) CID-MS<sup>3</sup> mass spectrum of the product ion at  $m/z$  303.

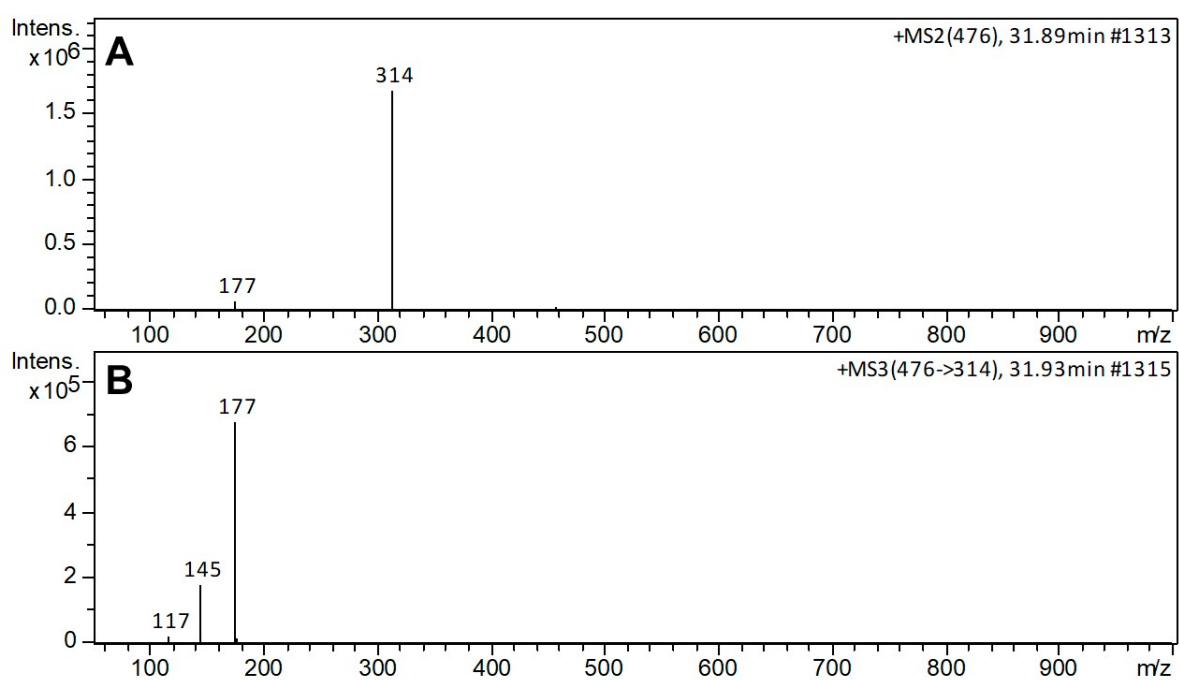

**Figure S15.** CID-MS<sup>n</sup> mass spectra in positive ion mode for compound 15: (A) CID-MS<sup>2</sup> spectrum of the precursor ion at  $m/z$  476; (B) CID-MS<sup>3</sup> mass spectrum of the product ion at  $m/z$  177.

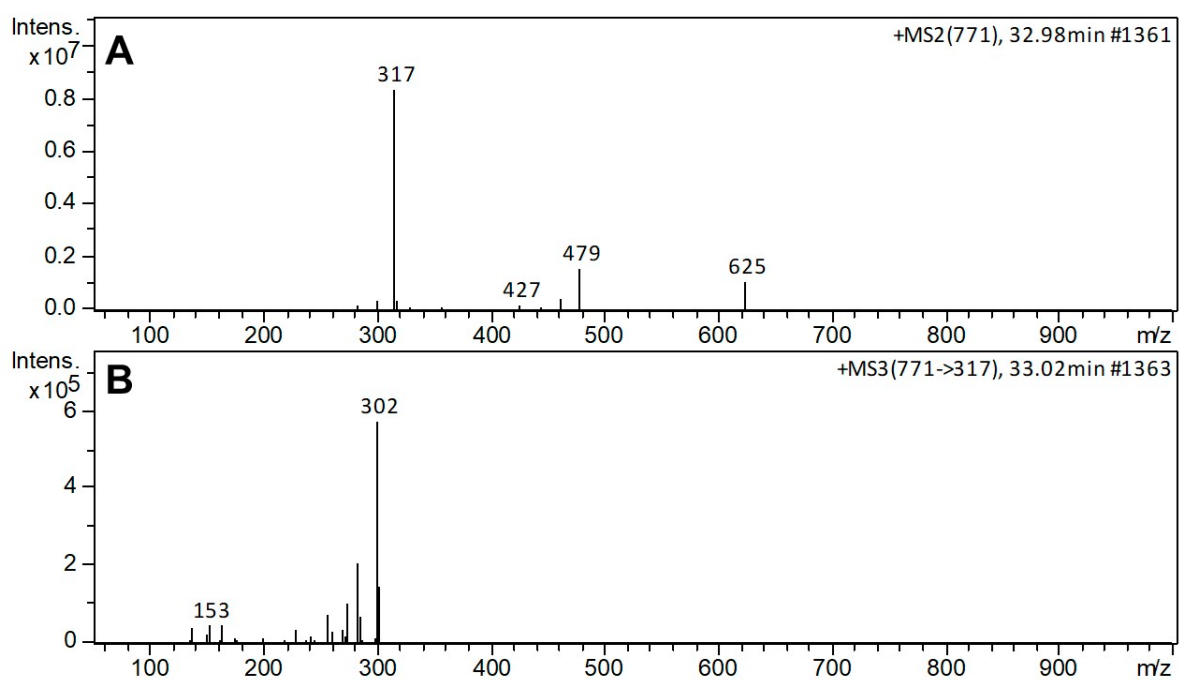

**Figure S16.** CID-MS<sup>n</sup> mass spectra in positive ion mode for compound 16: (A) CID-MS<sup>2</sup> spectrum of the precursor ion at  $m/z$  771; (B) CID-MS<sup>3</sup> mass spectrum of the product ion at  $m/z$  317.

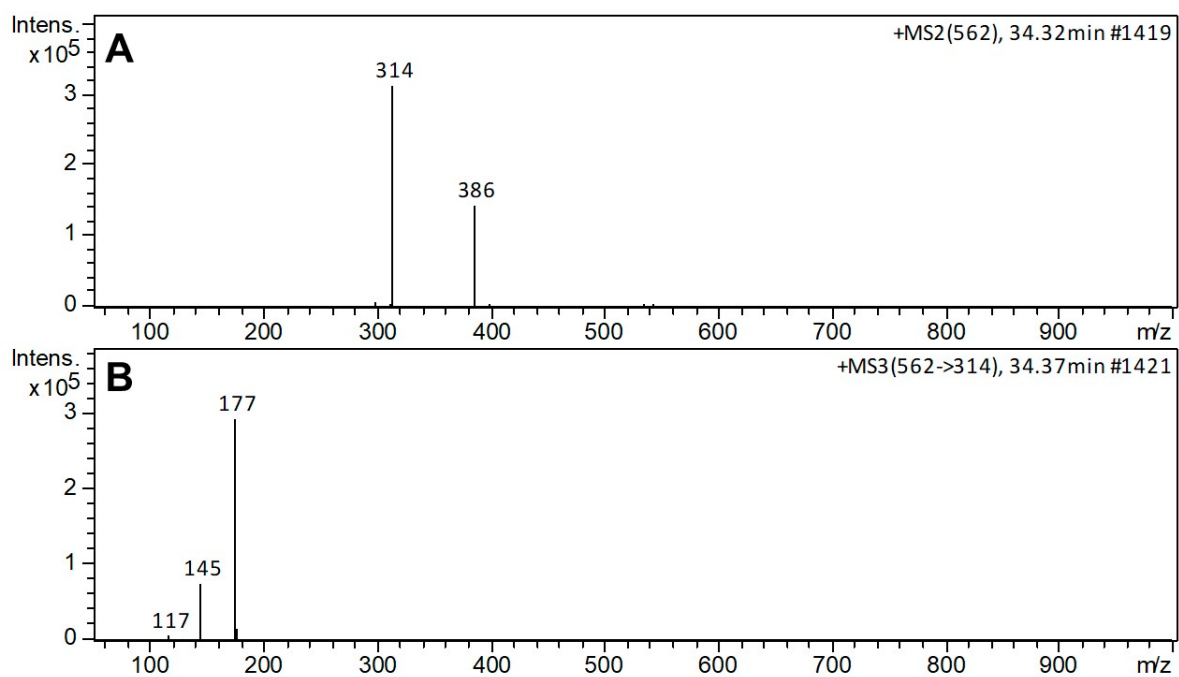

**Figure S17.** CID-MS<sup>n</sup> mass spectra in positive ion mode for compound 17: (A) CID-MS<sup>2</sup> spectrum of the precursor ion at  $m/z$  562; (B) CID-MS<sup>3</sup> mass spectrum of the product ion at  $m/z$  314.

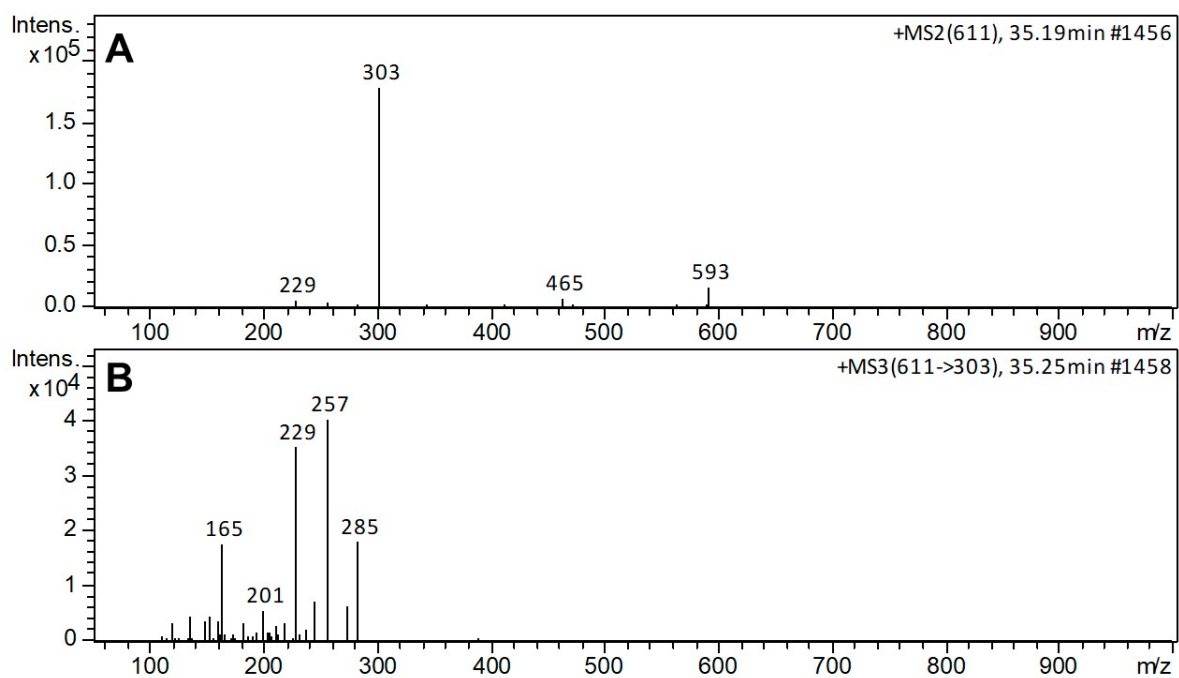

**Figure S18.** CID-MS<sup>n</sup> mass spectra in positive ion mode for compound 18: (A) CID-MS<sup>2</sup> spectrum of the precursor ion at  $m/z$  611; (B) CID-MS<sup>3</sup> mass spectrum of the product ion at  $m/z$  303.

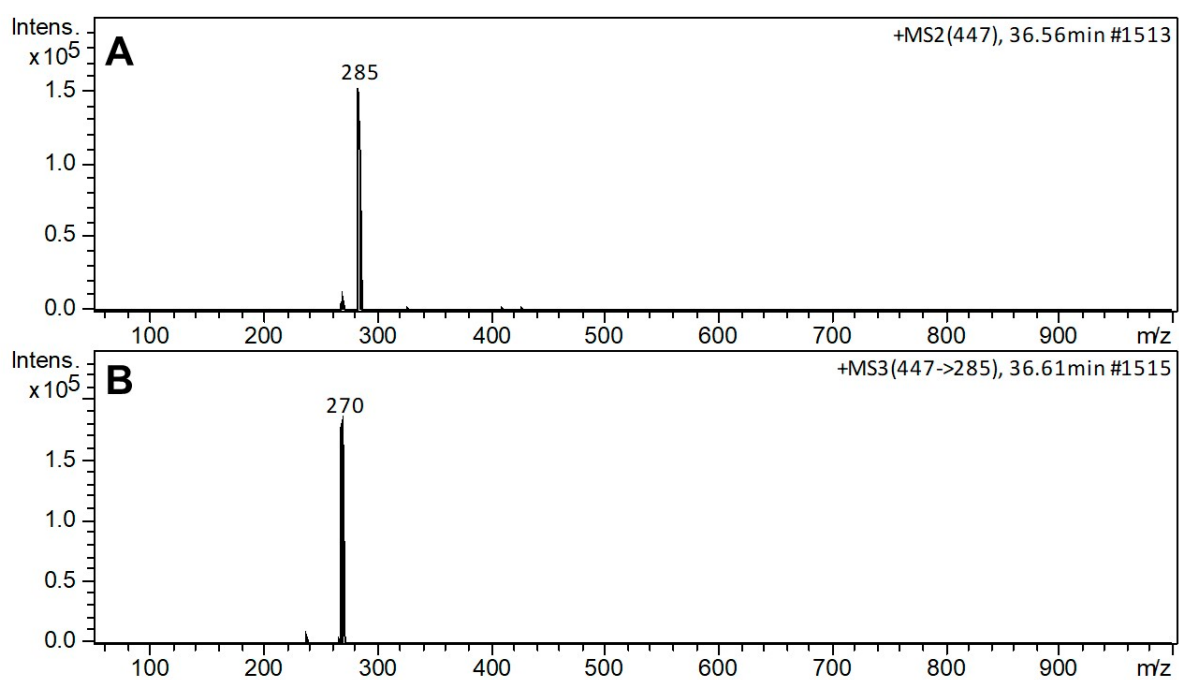

**Figure S19.** CID-MS<sup>n</sup> mass spectra in positive ion mode for compound 19: (A) CID-MS<sup>2</sup> spectrum of the precursor ion at  $m/z$  447; (B) CID-MS<sup>3</sup> mass spectrum of the product ion at  $m/z$  285.

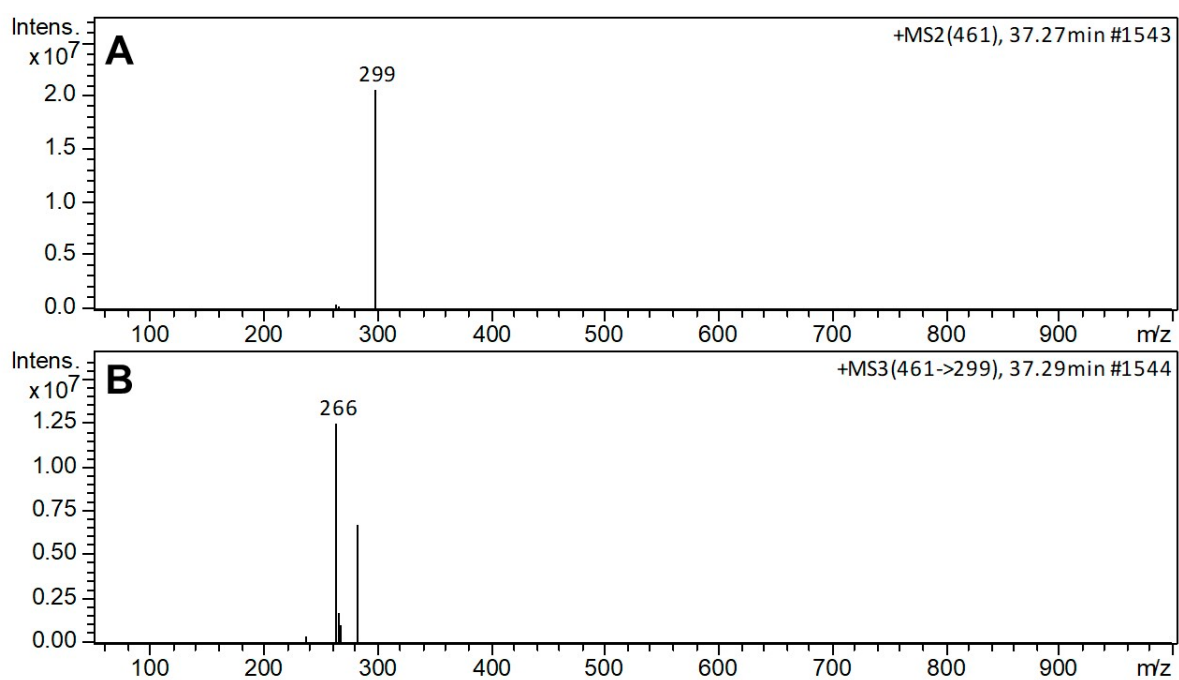

**Figure S20.** CID-MS<sup>n</sup> mass spectra in positive ion mode for compound 20: (A) CID-MS<sup>2</sup> spectrum of the precursor ion at  $m/z$  461; (B) CID-MS<sup>3</sup> mass spectrum of the product ion at  $m/z$  299.

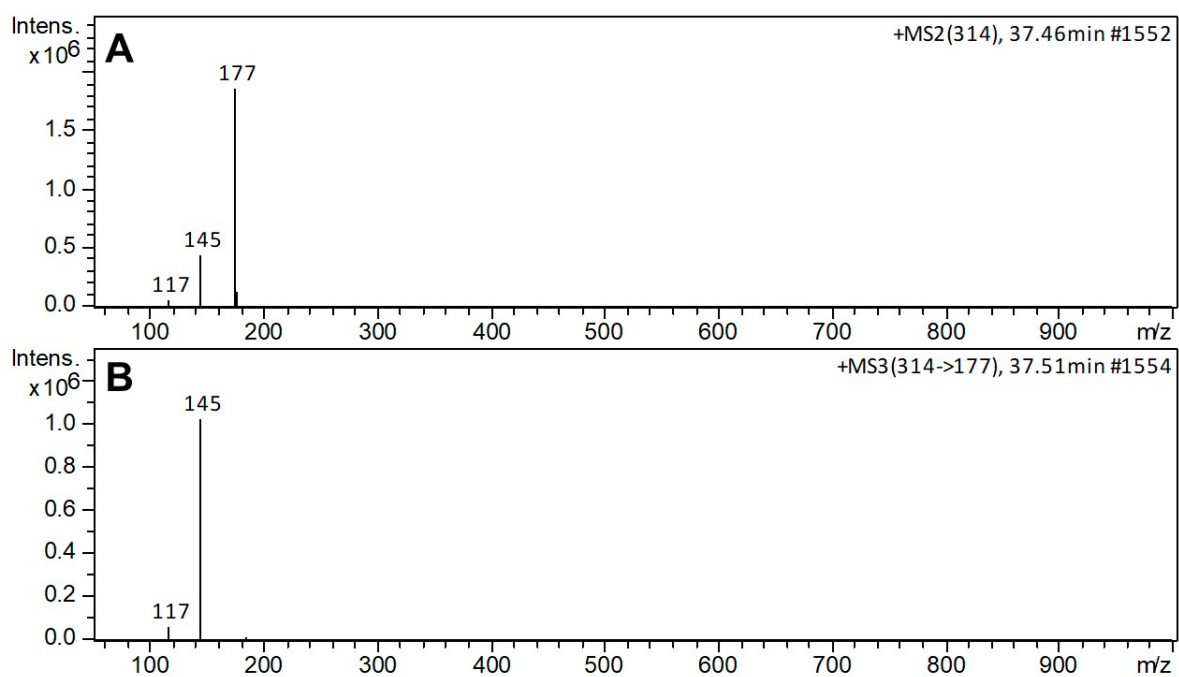

**Figure S21.** CID-MS<sup>n</sup> mass spectra in positive ion mode for compound 21: (A) CID-MS<sup>2</sup> spectrum of the precursor ion at  $m/z$  314; (B) CID-MS<sup>3</sup> mass spectrum of the product ion at  $m/z$  177.

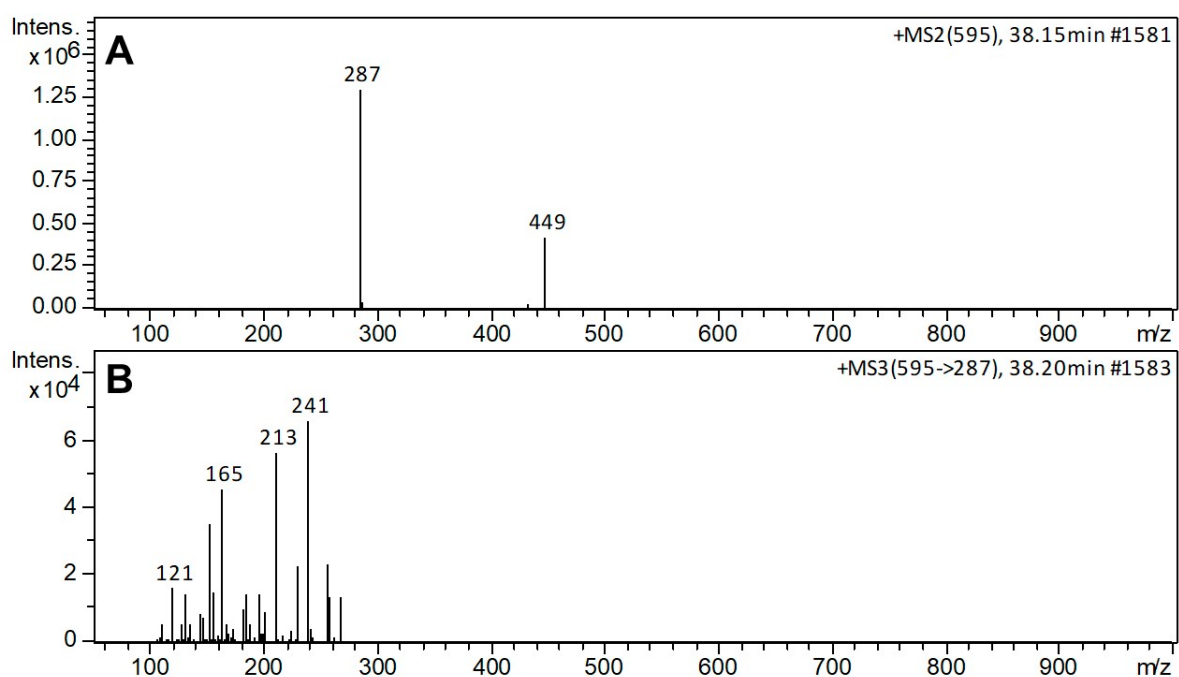

**Figure S22.** CID-MS<sup>n</sup> mass spectra in positive ion mode for compound 22: (A) CID-MS<sup>2</sup> spectrum of the precursor ion at  $m/z$  595; (B) CID-MS<sup>3</sup> mass spectrum of the product ion at  $m/z$  287.

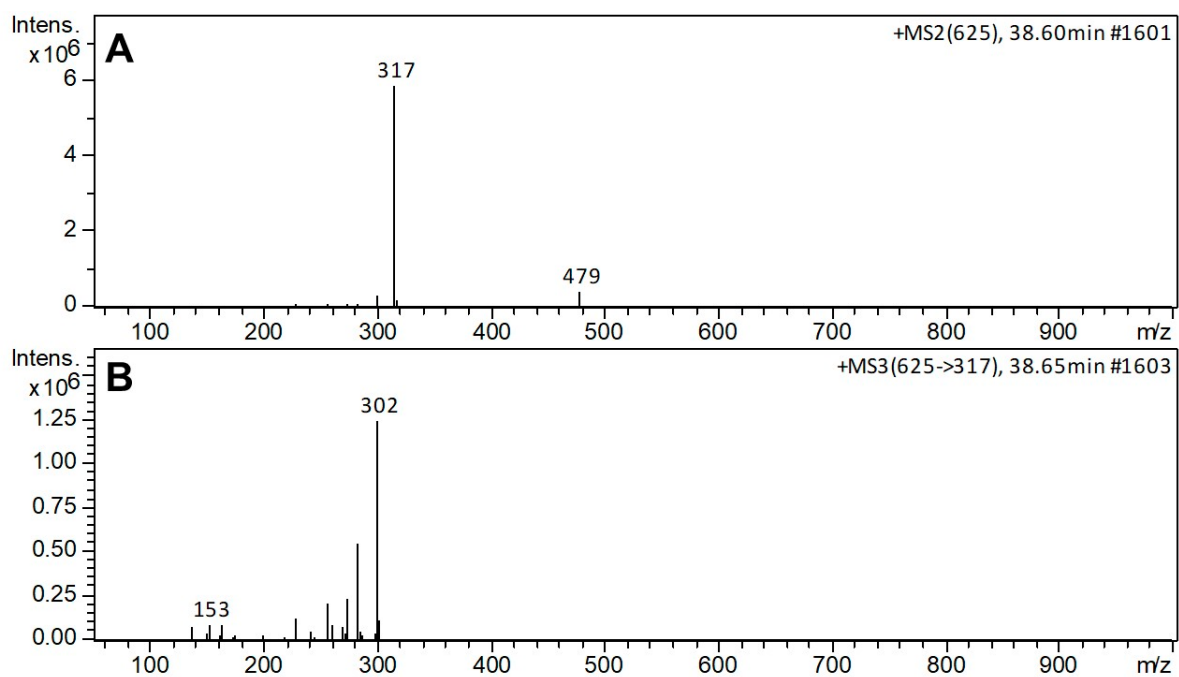

**Figure S23.** CID-MS<sup>n</sup> mass spectra in positive ion mode for compound 23: (A) CID-MS<sup>2</sup> spectrum of the precursor ion at  $m/z$  625; (B) CID-MS<sup>3</sup> mass spectrum of the product ion at  $m/z$  317.

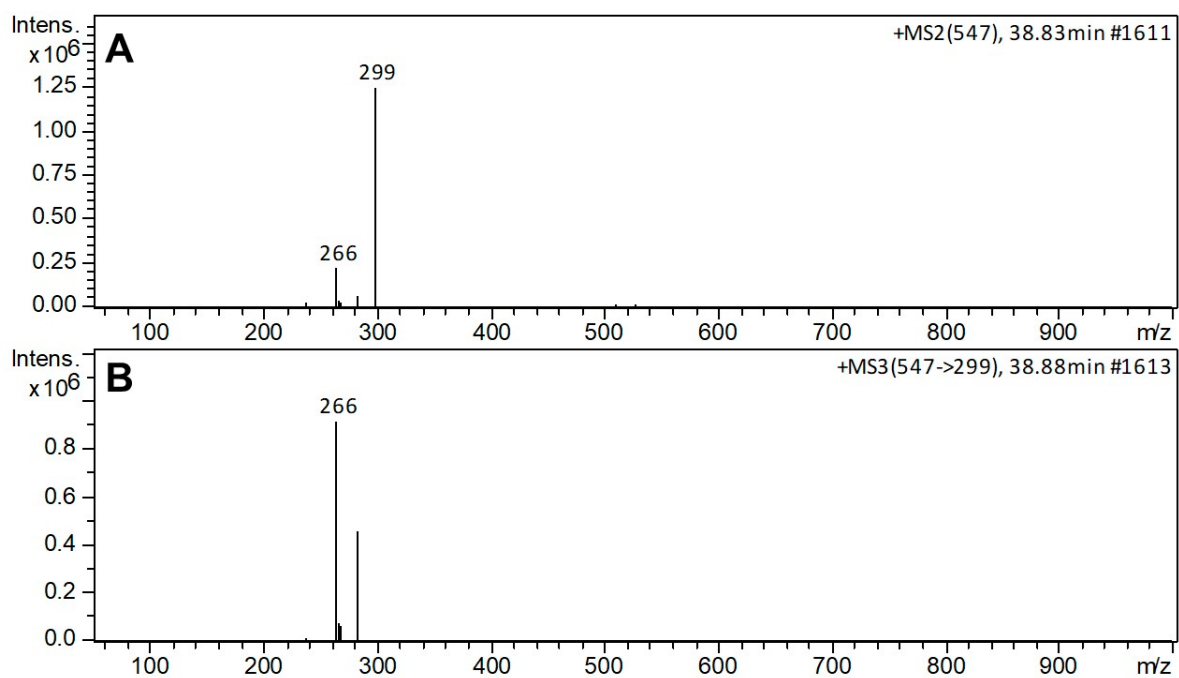

**Figure S24.** CID-MS<sup>n</sup> mass spectra in positive ion mode for compound 24: (A) CID-MS<sup>2</sup> spectrum of the precursor ion at  $m/z$  547; (B) CID-MS<sup>3</sup> mass spectrum of the product ion at  $m/z$  299.

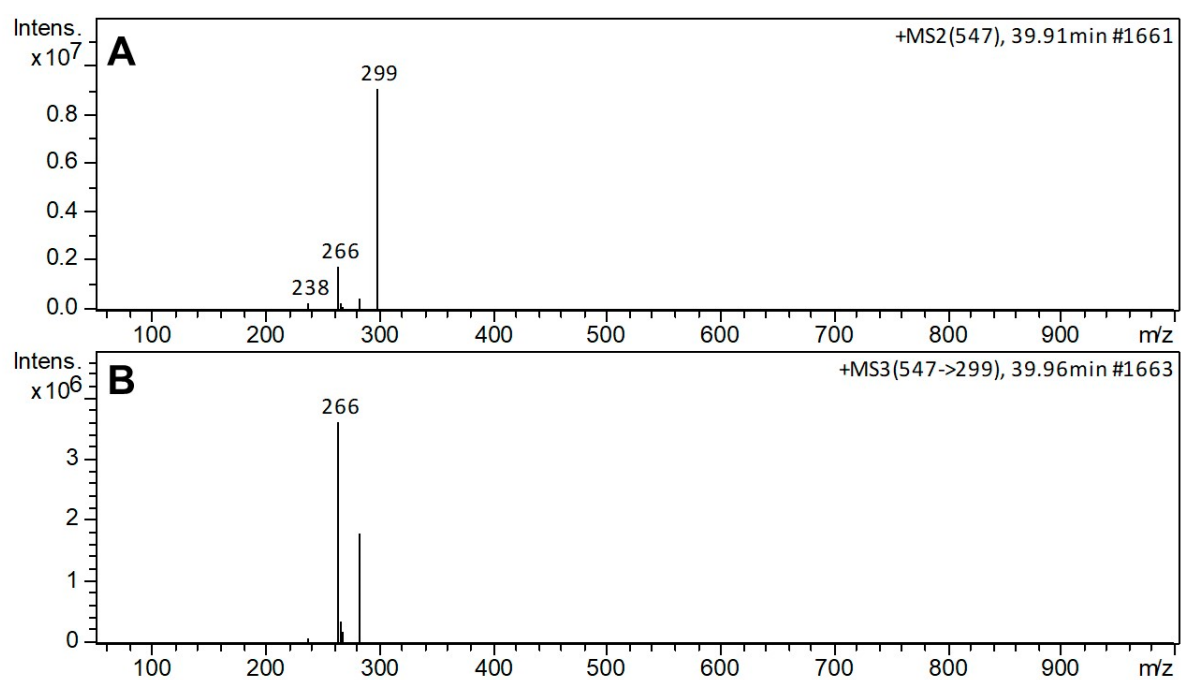

**Figure S25.** CID-MS<sup>n</sup> mass spectra in positive ion mode for compound 25: **(A)** CID-MS<sup>2</sup> spectrum of the precursor ion at  $m/z$  547; **(B)** CID-MS<sup>3</sup> mass spectrum of the product ion at  $m/z$  299.
